# Supplementary material for: Transcriptome profile and immune infiltrated landscape revealed a novel role of γδT cells in mediating pyroptosis in celiac disease
Source: J Transl Med. 2023 Jul 24;21:497. doi: 10.1186/s12967-023-04359-1 (PMC10364383; doi:10.1186/s12967-023-04359-1)
Supplement: Supplementary file 4 — Additional file 4: Table S1. The DEGs analysis between CeD and HC duodenal tissues in derivation cohort. [file 12967_2023_4359_MOESM4_ESM.xlsx]

## Sheet: diff
Genes	logFC	AveExpr	t	P.Value	adj.P.Val	B
TAP1	1.59658	11.4978	23.9332	3.90188e-44	1.22183e-39	88.8329
STAT1	2.07852	8.47536	20.4814	2.58002e-38	4.03954e-34	76.028
HCP5	1.46269	10.1789	20.0494	1.52304e-37	1.58974e-33	74.3201
GBP1	2.02451	8.65106	19.8564	3.39057e-37	2.65431e-33	73.5495
HLA-E	1.14285	11.3457	18.683	4.8689e-35	3.0493e-31	68.7562
PARP9	1.26011	8.95017	17.7229	3.22339e-33	1.68229e-29	64.6972
E2F5	1.68938	7.45227	16.6322	4.349e-31	1.70712e-27	59.9356
TNFSF13B	1.43128	8.08154	16.6315	4.36129e-31	1.70712e-27	59.9328
GBP4	2.01322	8.56102	16.5105	7.58737e-31	2.37591e-27	59.3944
LAP3	1.29101	10.2906	16.348	1.60012e-30	4.55509e-27	58.6686
CXCL10	2.52265	7.84825	15.3895	1.39486e-28	3.3599e-25	54.3168
IRF1	1.0583	10.2294	15.1093	5.25978e-28	1.17646e-24	53.0222
BATF2	1.15016	6.38042	14.9538	1.10317e-27	2.30298e-24	52.2994
WARS	1.5553	8.16088	14.5058	9.47194e-27	1.74473e-23	50.2
C2	1.31899	6.91133	14.4176	1.4503e-26	2.39025e-23	49.7838
IFNG	1.65314	5.75444	14.3333	2.18179e-26	3.41603e-23	49.3847
UBD	3.3225	7.72819	13.5043	1.25823e-24	1.57601e-21	45.4195
GABARAPL1	-1.20666	8.20162	-13.3874	2.24121e-24	2.69928e-21	44.8545
EPSTI1	1.15399	10.379	13.3334	2.92896e-24	3.39695e-21	44.5925
RIPK2	1.07447	6.94668	13.2821	3.77657e-24	4.22355e-21	44.3437
FGL2	1.2958	10.3077	12.9035	2.48536e-23	2.51053e-20	42.4986
GZMB	1.82257	6.53836	12.8608	3.07646e-23	3.01051e-20	42.2896
RARRES3	1.20688	11.3493	12.7988	4.19511e-23	3.98078e-20	41.9858
CXCL9	1.56645	6.17001	12.7655	4.95719e-23	4.43512e-20	41.8223
GUCA2B	-2.14186	7.78471	-12.7467	5.44539e-23	4.52019e-20	41.7303
IFI27	1.55818	11.6999	12.7452	5.48532e-23	4.52019e-20	41.7231
SLC19A1	-1.44943	6.98095	-12.6824	7.51669e-23	6.03532e-20	41.4144
GBP5	1.40545	6.23419	12.5285	1.62823e-22	1.25841e-19	40.657
NCALD	1.25414	7.07808	12.3224	4.59846e-22	3.34874e-19	39.6394
IGSF9	-1.13227	6.28476	-12.2352	7.1402e-22	4.55285e-19	39.208
CAPN13	-1.24865	8.44147	-12.1966	8.67776e-22	5.22568e-19	39.0168
DFNA5	-1.43378	8.56497	-12.1662	1.01213e-21	5.86926e-19	38.866
EPHX1	-1.10723	6.93174	-12.1144	1.31545e-21	7.48948e-19	38.609
CXCR6	1.09054	6.06887	11.7639	7.79426e-21	4.00114e-18	36.8642
PRAP1	-1.04558	10.0437	-11.706	1.04622e-20	5.28409e-18	36.5754
CYP3A4	-2.53067	9.87359	-11.6428	1.4439e-20	6.95606e-18	36.2594
F10	-1.16917	6.19417	-11.5566	2.23995e-20	1.06275e-17	35.8286
SLC46A1	-1.17454	7.4462	-11.4928	3.10199e-20	1.44979e-17	35.5092
VNN1	-1.23228	9.65827	-11.4164	4.5823e-20	2.07957e-17	35.1264
MYL4	1.40975	6.93809	11.315	7.69539e-20	3.37596e-17	34.6178
SCAMP5	-1.08819	7.21855	-11.3133	7.76233e-20	3.37596e-17	34.6093
NELL2	-1.38001	8.05999	-11.3103	7.88164e-20	3.3809e-17	34.5943
ACAT1	-1.02949	10.5734	-11.236	1.15312e-19	4.75114e-17	34.2209
LAMB2	-1.09155	7.14227	-11.1188	2.10106e-19	8.22407e-17	33.6322
LOC731000	1.5839	6.93208	10.9973	3.91829e-19	1.4435e-16	33.0206
UNC93A	-1.75093	6.73964	-10.8507	8.31386e-19	2.8233e-16	32.2823
DEFB1	-1.16776	7.0915	-10.7789	1.20244e-18	3.9635e-16	31.9201
CCNB2	1.04786	7.60073	10.764	1.29796e-18	4.18456e-16	31.8451
HLA-DQB1	1.61135	7.17468	10.7543	1.36428e-18	4.25173e-16	31.7962
CHST13	-1.28509	6.94445	-10.634	2.53126e-18	7.47772e-16	31.1895
NKG7	1.16878	7.52844	10.6087	2.88382e-18	8.43963e-16	31.0615
CASP5	1.08374	5.91082	10.5515	3.86986e-18	1.0724e-15	30.7728
PRC1	1.00631	7.58928	10.4886	5.34911e-18	1.44398e-15	30.455
PIM2	1.0659	7.53816	10.3905	8.86144e-18	2.25599e-15	29.9595
PAQR7	-1.18921	7.89581	-10.2469	1.85684e-17	4.47271e-15	29.2334
NOS2	1.77784	8.44919	10.2011	2.35064e-17	5.45243e-15	29.0019
BST2	1.16765	8.53522	10.1668	2.80405e-17	6.31698e-15	28.8287
LOC730130	-1.15803	6.93276	-10.0956	4.04774e-17	8.74145e-15	28.4684
OAS3	1.04139	7.30233	10.0579	4.91471e-17	1.0192e-14	28.2779
DKK4	1.39954	7.26846	9.94479	8.80103e-17	1.75538e-14	27.7059
LOC728811	-1.36439	9.49384	-9.94043	9.00084e-17	1.77266e-14	27.6839
TRPM6	-1.28901	7.199	-9.87513	1.26e-16	2.40583e-14	27.3537
TOP2A	1.0153	8.13577	9.81817	1.68952e-16	3.07591e-14	27.0657
IFITM1	1.24829	9.16395	9.80875	1.77351e-16	3.21016e-14	27.0181
REC8	1.00704	8.09947	9.78202	2.03533e-16	3.63927e-14	26.883
CDC20	1.12594	8.90083	9.77867	2.0707e-16	3.6428e-14	26.866
AQP10	-1.61728	11.0143	-9.7659	2.21149e-16	3.84725e-14	26.8015
UPB1	-1.46712	5.83776	-9.719	2.81563e-16	4.81796e-14	26.5644
CEP55	1.07694	7.39693	9.66083	3.79863e-16	6.26055e-14	26.2705
MMP12	1.1404	5.667	9.65395	3.93554e-16	6.43877e-14	26.2357
IFITM3	1.06278	9.70966	9.57742	5.83578e-16	9.04661e-14	25.849
PCDH24	-1.05692	10.0177	-9.40744	1.39902e-15	1.94706e-13	24.9908
PCK1	-1.40141	7.96394	-9.3807	1.60522e-15	2.19502e-13	24.8559
RAC2	1.03154	9.24912	9.31139	2.29209e-15	2.99061e-13	24.5063
PFKFB4	-1.027	9.48605	-9.28378	2.64136e-15	3.37599e-13	24.3671
TM4SF4	-1.32767	12.6253	-9.25317	3.09108e-15	3.88731e-13	24.2128
TREH	-1.23582	7.23265	-9.19496	4.16784e-15	5.00045e-13	23.9195
APOB	-1.0078	11.8656	-9.17867	4.5313e-15	5.37474e-13	23.8374
LOC728588	1.21567	6.37747	8.94098	1.53255e-14	1.6213e-12	22.6418
HLA-F	1.01903	9.22276	8.92228	1.68648e-14	1.76623e-12	22.5479
CYP2C9	-1.50567	8.69961	-8.88353	2.05631e-14	2.09063e-12	22.3534
TRIM22	1.1105	7.06381	8.87602	2.1369e-14	2.13786e-12	22.3157
TMEM86B	-1.14193	6.86694	-8.86448	2.26684e-14	2.24992e-12	22.2578
CCL5	1.14795	8.2735	8.81083	2.98224e-14	2.90018e-12	21.9887
OAS2	1.26757	8.15771	8.80451	3.08003e-14	2.96764e-12	21.957
LPL	1.90754	6.24503	8.69317	5.43844e-14	4.89365e-12	21.3993
ASAH2	-1.18103	7.0581	-8.66457	6.29256e-14	5.55672e-12	21.2563
CYP1A1	-1.38415	5.89568	-8.64688	6.88655e-14	5.95706e-12	21.1678
NOS2A	1.13718	6.72674	8.58591	9.39593e-14	7.88804e-12	20.8631
CBS	-1.01612	6.855	-8.5811	9.6292e-14	8.00759e-12	20.839
IFI44	1.00049	7.82387	8.47127	1.68371e-13	1.31153e-11	20.291
LOC653308	-1.18807	8.54886	-8.44188	1.95484e-13	1.50403e-11	20.1446
MS4A10	-1.56125	11.2769	-8.33483	3.36545e-13	2.45655e-11	19.612
TRIM31	1.00449	9.14375	8.28838	4.25846e-13	3.04451e-11	19.3813
UGT2B11	-1.28001	9.16009	-8.27136	4.64158e-13	3.2734e-11	19.2969
APOC2	-1.27741	8.58176	-8.21794	6.08205e-13	4.15837e-11	19.0319
LCN2	1.9222	7.91875	8.13234	9.37201e-13	6.0887e-11	18.6082
SLC10A2	-1.17484	9.00244	-8.12925	9.51942e-13	6.17166e-11	18.5929
SOAT2	-1.02682	6.36234	-8.12614	9.66993e-13	6.23202e-11	18.5775
APOA1	-1.84204	12.8341	-8.08511	1.18923e-12	7.49288e-11	18.3748
NEU4	-1.12502	8.49909	-8.05226	1.40333e-12	8.66085e-11	18.2126
DPEP1	-1.02845	7.30479	-8.0064	1.76766e-12	1.05836e-10	17.9864
MIR1978	-1.00475	11.3818	-7.96913	2.13193e-12	1.25252e-10	17.8029
G6PC	-1.06467	7.00339	-7.88132	3.31272e-12	1.84253e-10	17.3712
HK2	1.17693	6.22855	7.86234	3.64325e-12	2.01208e-10	17.278
HMGCS2	-1.99772	10.6338	-7.83713	4.13375e-12	2.26301e-10	17.1543
PODNL1	-1.22911	7.03325	-7.75933	6.0997e-12	3.26713e-10	16.7733
IGFBP5	1.05624	8.53768	7.6191	1.22696e-11	6.24733e-10	16.0891
SMOC2	1.05245	7.15744	7.57677	1.51422e-11	7.53837e-10	15.8832
SUSD2	-1.35483	9.27015	-7.56786	1.58272e-11	7.79264e-10	15.8399
HLA-DPB1	1.11254	6.84945	7.53764	1.83878e-11	8.89947e-10	15.6932
LAIR2	1.22882	6.19973	7.52896	1.91965e-11	9.24798e-10	15.651
MT1G	-1.27084	11.6249	-7.4192	3.30421e-11	1.50171e-09	15.1197
CXCL11	1.50698	6.22748	7.386	3.8925e-11	1.74377e-09	14.9594
IDO1	1.07691	6.71144	7.32681	5.21024e-11	2.26288e-09	14.6743
IFI44L	1.37264	6.93816	7.32015	5.38378e-11	2.31895e-09	14.6422
LOC652694	1.33416	9.34659	7.25692	7.34511e-11	3.06265e-09	14.3385
LOC653381	-1.06227	10.8741	-7.17546	1.09475e-10	4.40064e-09	13.9483
HLA-DRB4	1.02569	11.5316	7.03112	2.21262e-10	8.33766e-09	13.2607
MSLN	-1.185	7.28149	-6.91246	3.93234e-10	1.40728e-08	12.6991
ENPP3	-1.2289	8.63357	-6.80392	6.63512e-10	2.27322e-08	12.1884
MT1F	-1.1627	9.6655	-6.69511	1.11776e-09	3.64348e-08	11.6795
APOC3	-1.46507	12.6169	-6.61448	1.64191e-09	5.1108e-08	11.3045
SPINK4	1.41514	10.3906	6.56378	2.08917e-09	6.37569e-08	11.0696
LOC647506	1.3584	10.0008	6.48944	2.97057e-09	8.71795e-08	10.7265
HLA-DPA1	1.06322	10.7634	6.34591	5.8353e-09	1.61419e-07	10.0688
CA9	1.05615	7.45861	6.30373	7.10795e-09	1.93043e-07	9.8767
MT1X	-1.08381	8.73459	-6.1092	1.75326e-08	4.39917e-07	8.99831
UGT2B7	-1.00012	11.8797	-6.0181	2.66483e-08	6.38458e-07	8.59136
SLC23A1	-1.02951	7.85741	-5.87192	5.1871e-08	1.17362e-06	7.9445
CCL20	1.01196	6.78352	5.84426	5.87875e-08	1.31329e-06	7.82301
SLC28A2	-1.04309	9.92246	-5.54611	2.22694e-07	4.38305e-06	6.53199
REG4	1.20645	10.083	5.3163	6.07283e-07	1.07864e-05	5.56185
ITLN1	1.07229	9.80871	5.25005	8.07665e-07	1.4004e-05	5.2865
TPSG1	-1.0121	7.68495	-5.17724	1.10261e-06	1.84933e-05	4.98614
LCT	-1.56135	9.52308	-4.85818	4.19471e-06	6.17261e-05	3.69985
HLA-DRB1	-1.4469	8.13902	-2.97288	0.00366517	0.0246184	-2.68678
