# Supplementary material for: Transcriptome profile and immune infiltrated landscape revealed a novel role of γδT cells in mediating pyroptosis in celiac disease
Source: J Transl Med. 2023 Jul 24;21:497. doi: 10.1186/s12967-023-04359-1 (PMC10364383; doi:10.1186/s12967-023-04359-1)
Supplement: Supplementary file 6 — Additional file 6: Table S5. Pyroptosis associated genes identified from the Reactome database, GO database, and previous reports. [file 12967_2023_4359_MOESM6_ESM.xlsx]

## Sheet: Sheet1
GO database	Reactome database	Peivious study	Genes intersection	#Identification of the pyroptosis‑related prognostic gene signature and the associated regulation axis in lung adenocarcinoma/A novel defined pyroptosis-related gene signature for predicting the prognosis of ovarian cancer
AIM2	BAK1	AIM2	AIM2
APIP	BAX	CASP1	APIP
CASP1	CASP1	CASP3	BAK1
CASP4	CASP3	CASP4	BAX
CASP6	CASP4	CASP5	CASP1
CASP8	CASP5	CASP6	CASP3
DHX9	CHMP2A	CASP8	CASP4
DPP9	CHMP2B	CASP9	CASP5
ELANE	CHMP3	ELANE	CASP6
GSDMA	CHMP4A	GPX4	CASP8
GSDMB	CHMP4B	GSDMA	CASP9
GSDMC	CHMP4C	GSDMB	CHMP2A
GSDMD	CHMP6	GSDMC	CHMP2B
GSDME	CHMP7	GSDMD	CHMP3
GTF2H2	CYCS	GSDME	CHMP4A
GZMA	ELANE	IL18	CHMP4B
GZMB	GSDMD	IL1B	CHMP4C
LOC100068503	GSDME	IL6	CHMP6
LOC100151870	GZMB	NLRC4	CHMP7
LOC102165484	HMGB1	NLRP1	CYCS
LOC103100274	IL18	NLRP2	DHX9
MEFV	IL1A	NLRP3	DPP9
NAIP	IL1B	NLRP6	ELANE
NLRC4	IRF1	NLRP7	GPX4
NLRP1	IRF2	NOD1	GSDMA
NLRP3	TP53	NOD2	GSDMB
NLRP6	TP63	PJVK	GSDMC
NLRP9		PLCG1	GSDMD
PYCARD		PRKACA	GSDME
TREM2		PYCARD	GTF2H2
ZBP1		SCAF11	GZMA
		TIRAP	GZMB
		TNF	HMGB1
			IL18
			IL1A
			IL1B
			IL6
			IRF1
			IRF2
			LOC100068503
			LOC100151870
			LOC102165484
			LOC103100274
			MEFV
			NAIP
			NLRC4
			NLRP1
			NLRP2
			NLRP3
			NLRP6
			NLRP7
			NLRP9
			NOD1
			NOD2
			PJVK
			PLCG1
			PRKACA
			PYCARD
			SCAF11
			TIRAP
			TNF
			TP53
			TP63
			TREM2
			ZBP1
