# Supplementary material for: Transcriptome profile and immune infiltrated landscape revealed a novel role of γδT cells in mediating pyroptosis in celiac disease
Source: J Transl Med. 2023 Jul 24;21:497. doi: 10.1186/s12967-023-04359-1 (PMC10364383; doi:10.1186/s12967-023-04359-1)
Supplement: Supplementary file 8 — Additional file 8: Table S7. The DEGs analysis between CeD and HC duodenal γδT cells. [file 12967_2023_4359_MOESM8_ESM.xlsx]

## Sheet: diff
Gene	logFC	AveExpr	t	P.Value	adj.P.Val	B
HLA-DPA1	2.88055	9.33497	9.55454	8.44947e-11	2.91591e-06	13.9843
PRNP	-1.45718	9.28225	-8.8374	5.12328e-10	8.84022e-06	12.1518
PAG1	4.58487	6.95816	8.48054	1.288e-09	1.45998e-05	11.2153
SYT11	2.62905	7.99856	8.37608	1.69223e-09	1.45998e-05	10.9382
COTL1	1.47928	11.8297	8.17531	2.8707e-09	1.98135e-05	10.4018
CXCR6	4.74778	10.0654	7.80521	7.70604e-09	3.91214e-05	9.40049
TNFRSF9	2.954	9.08158	7.79432	7.93537e-09	3.91214e-05	9.37077
AKT3	3.0805	8.36866	7.73914	9.20766e-09	3.97195e-05	9.22008
CAPN2	2.31095	9.15905	7.66067	1.13837e-08	4.36501e-05	9.00514
MAML3	-5.55018	2.25253	-7.60373	1.32839e-08	4.58428e-05	8.84877
FCGR3A	-6.82775	2.96722	-7.5223	1.65765e-08	5.20049e-05	8.62453
LINC02528	4.79055	4.06342	7.32487	2.84467e-08	7.75148e-05	8.07792
JAG1	-4.88339	1.71011	-7.30419	3.011e-08	7.75148e-05	8.02042
HLA-DPB1	2.75938	8.72892	7.2884	3.14462e-08	7.75148e-05	7.9765
CASP4LP	-1.94662	7.07018	-7.1323	4.83721e-08	0.000111288	7.54098
KLHL23	-3.59405	7.48875	-7.07983	5.59397e-08	0.000120655	7.39405
JAKMIP1	5.4009	5.79873	6.99906	7.00043e-08	0.000142109	7.1674
INPP5F	2.40857	7.10085	6.89967	9.23381e-08	0.000177033	6.88769
GBP1	2.50719	8.66675	6.87886	9.78612e-08	0.000177747	6.82902
SMCO4	3.62087	6.60579	6.70033	1.61368e-07	0.000257109	6.3242
NAB1	2.05895	8.23886	6.69507	1.63774e-07	0.000257109	6.30927
SLC1A4	2.10427	8.5117	6.68755	1.6727e-07	0.000257109	6.28796
TNFSF8	4.48708	4.62896	6.67896	1.71357e-07	0.000257109	6.26361
S100A4	5.04904	6.90544	6.42395	3.51977e-07	0.000488689	5.53798
SAP30	3.08072	3.07442	6.42191	3.5402e-07	0.000488689	5.53215
HLA-DRB6	4.11029	4.91524	6.34896	4.35388e-07	0.000577893	5.3238
IRF8	-2.35013	8.33527	-6.26564	5.51714e-07	0.000705172	5.08544
KCNK5	1.81522	6.88897	6.14788	7.71666e-07	0.000908592	4.74792
GZMK	-5.49292	5.59211	-6.14773	7.71985e-07	0.000908592	4.74751
DUSP4	2.07126	9.81067	6.13971	7.89851e-07	0.000908592	4.7245
FCHO2	-3.76498	2.40126	-6.04728	1.0285e-06	0.0011052	4.45912
NCAM1	-5.38289	3.30813	-6.03958	1.0514e-06	0.0011052	4.437
SC5D	-1.16153	8.61929	-6.03777	1.05684e-06	0.0011052	4.43181
WEE1	2.73586	6.30955	6.01609	1.12448e-06	0.00114134	4.36949
PLAC8	-3.17637	4.41359	-5.96196	1.31293e-06	0.00129455	4.21386
ADGRG3	-5.84613	2.61862	-5.9241	1.46334e-06	0.00140278	4.10496
RORA	2.43866	8.64046	5.90119	1.56263e-06	0.00144869	4.03905
PHACTR2	1.96575	8.57271	5.894	1.59519e-06	0.00144869	4.01836
ZNF334	-3.77777	1.24821	-5.81895	1.97844e-06	0.00174492	3.80231
TFRC	1.23637	9.97275	5.75072	2.40678e-06	0.0020258	3.60578
FABP5	1.78221	6.13814	5.68317	2.92264e-06	0.00240144	3.41115
BUB1B	4.75873	4.30442	5.65368	3.18133e-06	0.00253941	3.32619
ATP2B4	1.09556	8.85524	5.63977	3.31131e-06	0.00253941	3.28608
RASGRF2	-4.40114	5.27006	-5.62359	3.46907e-06	0.00253941	3.23947
LINC00402	-4.57621	5.82724	-5.61793	3.52604e-06	0.00253941	3.22315
SPON2	-1.13488	7.14006	-5.61692	3.5363e-06	0.00253941	3.22024
ACVR2A	-4.06314	1.95063	-5.58482	3.87868e-06	0.00267707	3.12772
GBP4	1.04213	8.2818	5.56839	4.06661e-06	0.00275174	3.08036
TCEAL4	-4.12475	3.81884	-5.55827	4.18678e-06	0.00277857	3.05121
BEX4	-1.69949	7.66654	-5.49836	4.9753e-06	0.00312177	2.87856
SP2	1.23644	6.54593	5.47171	5.37245e-06	0.00331077	2.80175
NUSAP1	3.09204	6.74592	5.44614	5.78315e-06	0.00350134	2.7281
MIAT	2.10104	8.30164	5.39639	6.67488e-06	0.00397155	2.58477
DHRS3	-5.46887	6.10809	-5.37759	7.04656e-06	0.004028	2.53063
TNIP3	1.27313	8.76753	5.374	7.1199e-06	0.004028	2.52028
BTN3A3	1.37121	8.64889	5.33908	7.87391e-06	0.00435397	2.41974
CENPF	2.82204	6.14727	5.33581	7.94843e-06	0.00435397	2.41033
TP73	4.67085	3.75373	5.31573	8.42214e-06	0.00454138	2.35253
RNF130	-2.54916	6.58548	-5.21978	1.11062e-05	0.00572051	2.07647
SPRY1	-1.13595	8.85562	-5.14704	1.36973e-05	0.00675274	1.86741
ARNTL	1.57666	7.82216	5.12291	1.46836e-05	0.00713705	1.79812
ZNF25	1.3469	6.89763	5.10926	1.52729e-05	0.00732041	1.75892
KNL1	3.31136	4.36918	5.09124	1.60869e-05	0.00760492	1.7072
ZNF677	-2.37321	5.48579	-5.08348	1.64504e-05	0.00767165	1.68496
TRAF3IP2	-2.03436	4.93715	-5.0773	1.67463e-05	0.00770553	1.6672
FOSL2	-1.23355	11.1182	-5.07211	1.69984e-05	0.00771864	1.65232
BATF	1.6319	6.53832	5.06094	1.75543e-05	0.00786753	1.62028
HLA-DQA1	2.6145	4.44584	5.04932	1.81521e-05	0.00792947	1.58695
RNF165	-2.22985	2.43616	-5.01203	2.02102e-05	0.00859758	1.48007
HLA-DRB1	3.01855	7.68832	5.00149	2.08326e-05	0.00859758	1.44989
CDCA7	5.09843	5.72467	5.00086	2.08705e-05	0.00859758	1.44808
HDAC9	4.43524	4.5038	4.99992	2.09272e-05	0.00859758	1.44538
TESC	3.34296	5.28986	4.96953	2.28407e-05	0.00927331	1.35836
TGFBR3	3.73553	3.4859	4.9432	2.46389e-05	0.00988709	1.28301
NLRC5	1.07688	9.26902	4.93754	2.50429e-05	0.00993367	1.26685
ACSL4	1.13358	8.00667	4.91292	2.6881e-05	0.0103902	1.19646
MREG	3.25977	5.12453	4.91014	2.70971e-05	0.0103902	1.1885
GRAP2	3.55627	6.35649	4.87499	2.99792e-05	0.0112455	1.08809
TIPARP	-1.05737	9.26707	-4.862	3.11199e-05	0.0115478	1.051
CD55	-1.30888	9.27815	-4.84138	3.30201e-05	0.0120601	0.992157
INPP4B	3.81889	4.97679	4.83394	3.37337e-05	0.0120601	0.970932
HIVEP3	2.07053	6.97668	4.83225	3.38982e-05	0.0120601	0.966104
TGFBR1	-1.12446	8.35868	-4.82595	3.45168e-05	0.0121494	0.948156
GALNT8	-3.94307	2.00395	-4.82257	3.48535e-05	0.0121494	0.938519
MGLL	1.40106	7.22038	4.80034	3.71516e-05	0.0125696	0.875158
OTUD5	-1.01659	7.52017	-4.79071	3.81935e-05	0.0127967	0.84772
SESN1	-1.88001	8.47658	-4.76126	4.1562e-05	0.01366	0.763891
GRAMD2B	-3.58819	6.29651	-4.7576	4.20016e-05	0.0136743	0.753456
CD6	4.04823	5.24313	4.74098	4.40525e-05	0.0140294	0.706192
KIAA0040	1.41355	8.10125	4.73893	4.43118e-05	0.0140294	0.700374
AHCY	1.13897	7.18266	4.72748	4.57914e-05	0.014366	0.667817
ZNF223	-3.60397	2.09769	-4.72095	4.66577e-05	0.0143764	0.649243
CD300A	-4.22466	3.09953	-4.70492	4.88519e-05	0.0149193	0.603707
CASS4	1.62617	7.37139	4.69263	5.06026e-05	0.0152483	0.568824
MYRF	-3.10508	1.13215	-4.69118	5.08131e-05	0.0152483	0.564713
FKBP11	1.38801	8.48419	4.68224	5.2132e-05	0.0153613	0.53933
TBXAS1	3.95202	4.70419	4.66286	5.51082e-05	0.0159814	0.48435
HDGFL3	1.98087	4.97448	4.65158	5.69173e-05	0.016263	0.452371
SPATA6	-3.02047	1.88193	-4.65094	5.70217e-05	0.016263	0.450556
P2RX5	1.32818	7.34121	4.62695	6.10729e-05	0.0170652	0.382621
MZB1	1.69071	7.26756	4.62556	6.13179e-05	0.0170652	0.378659
ARMCX2	-3.83344	1.84364	-4.62035	6.22383e-05	0.0171828	0.363915
IFNG	4.59218	6.2177	4.61253	6.3646e-05	0.0174319	0.341786
HLA-DRB5	3.66036	5.83559	4.60605	6.48367e-05	0.0176182	0.323448
AMZ1	3.38796	4.66753	4.60063	6.58487e-05	0.0177534	0.308128
BEX2	-2.20706	5.82143	-4.59667	6.65994e-05	0.0178093	0.296914
SLC28A3	-2.48372	0.584405	-4.59122	6.76455e-05	0.0178202	0.2815
IL10	3.29164	4.34719	4.58005	6.98399e-05	0.0182589	0.249927
CASP10	-2.64927	5.33208	-4.55239	7.55807e-05	0.0194648	0.171829
DPF3	3.12758	4.41702	4.54218	7.78179e-05	0.0198926	0.142998
SPART	-4.01629	4.20951	-4.53631	7.91319e-05	0.0200797	0.126451
ACSS2	-2.87885	2.27943	-4.52508	8.17098e-05	0.0205825	0.0947757
LDB2	-4.221	3.16427	-4.50656	8.61426e-05	0.0210622	0.0425891
SMPDL3A	-3.60588	1.52958	-4.50616	8.62408e-05	0.0210622	0.0414639
TNFRSF10A	-2.38234	2.08589	-4.50441	8.66717e-05	0.0210622	0.0365412
TPX2	4.00533	4.26042	4.48223	9.2329e-05	0.0217476	-0.0258967
ANXA6	1.1093	9.89716	4.47164	9.51576e-05	0.0219694	-0.0556854
WDR76	1.75795	6.21765	4.47041	9.54913e-05	0.0219694	-0.0591409
CD70	3.11593	2.84116	4.46105	9.80699e-05	0.0222328	-0.0854396
FEZ1	-2.13948	2.89257	-4.45927	9.85689e-05	0.0222328	-0.0904486
CCDC102B	-2.96052	2.08535	-4.45146	0.000100786	0.0225852	-0.1124
ARHGAP29	-1.16938	2.88051	-4.43917	0.000104373	0.0230546	-0.146902
WNT10A	-2.27124	1.21244	-4.43578	0.000105385	0.0230546	-0.156423
LSR	-2.96507	3.24493	-4.43528	0.000105535	0.0230546	-0.157823
PTGER2	-1.83991	8.74406	-4.43522	0.000105553	0.0230546	-0.157992
ZMAT1	-3.14815	4.28786	-4.42925	0.000107362	0.0232728	-0.174755
MCC	-1.99007	5.701	-4.42697	0.000108061	0.0232728	-0.181154
TBC1D4	4.70156	3.79374	4.4253	0.000108575	0.0232728	-0.185836
ZBTB16	-3.21048	4.92307	-4.40789	0.000114084	0.0241536	-0.234646
LONRF3	-3.41718	2.14673	-4.40023	0.000116594	0.0245345	-0.256103
RUNX1	1.70031	5.76055	4.36857	0.000127565	0.0263609	-0.344734
RANBP17	-1.98029	2.77181	-4.36539	0.000128722	0.0264417	-0.353629
ZNF595	-1.61905	7.24532	-4.35626	0.0001321	0.0269749	-0.379144
ADORA2A	4.10896	5.7846	4.35363	0.000133092	0.0270177	-0.386518
SHCBP1	4.02725	3.40778	4.33821	0.000139042	0.0280605	-0.429592
TP53INP1	1.27286	8.87752	4.33009	0.000142278	0.02853	-0.452242
TMEM220-AS1	-1.66006	0.425778	-4.32825	0.000143022	0.02853	-0.457381
DDAH1	-2.88671	0.998687	-4.28757	0.000160487	0.0310802	-0.570772
TRGV9	1.68159	8.15658	4.28598	0.00016121	0.0310802	-0.575192
JAML	3.34547	9.05426	4.28349	0.00016235	0.0311262	-0.582128
ARID5B	1.21015	9.36989	4.26424	0.00017143	0.0326853	-0.635647
MYO7A	4.25234	3.1227	4.25891	0.000174034	0.0329995	-0.650473
CD226	1.50283	7.35968	4.25483	0.00017605	0.0330477	-0.661797
CNN3	-4.59042	5.16346	-4.25003	0.000178455	0.033289	-0.675134
ABCD2	1.56044	6.90738	4.23457	0.000186419	0.0343356	-0.71805
MCF2L	-2.69462	1.67248	-4.23338	0.00018705	0.0343356	-0.721371
GSTM2	-2.63263	6.78425	-4.22466	0.000191707	0.0350043	-0.745539
PLEKHG1	2.78278	3.17974	4.18999	0.0002114	0.0378001	-0.841585
INAVA	2.43569	4.93858	4.17819	0.000218538	0.0388751	-0.874189
HIPK2	1.9806	7.99611	4.16448	0.000227139	0.0401978	-0.912075
RALGPS2	-2.20514	2.41359	-4.14176	0.000242128	0.0422011	-0.974773
SLC2A10	-2.9854	2.3967	-4.1394	0.000243741	0.0422689	-0.981288
ZC3H12D	1.77225	5.33591	4.13142	0.000249267	0.0430109	-1.00327
MYBL1	-1.91794	5.23479	-4.12326	0.000255045	0.0436469	-1.02575
SPINK2	-3.19148	4.77099	-4.09995	0.000272295	0.0457331	-1.0899
IQGAP2	-1.8525	7.06444	-4.09786	0.000273895	0.0457331	-1.09564
LINC00943	2.35037	3.86965	4.09731	0.000274319	0.0457331	-1.09716
JADE1	-1.13049	8.67641	-4.08275	0.000285745	0.047409	-1.13714
DDX18P1	-1.39532	0.369059	-4.07453	0.000292405	0.0482817	-1.15971
EZH2	1.24195	8.11314	4.06274	0.000302221	0.0491964	-1.19205
ZNF433	-2.75141	4.00899	-4.05989	0.000304642	0.0492031	-1.19986
